# Supplementary material for: Ultralow-power consumption photonic synapse transistors based on organic array films fabricated using a particular prepatterned-guided crystallizing strategy
Source: Royal Society of Chemistry journal article supplement (doi:10.1039/d2tc05125g), 2023-01-01
Supplement: d2tc05125g1.pdf [file d2tc05125g1.pdf]

# Ultralow-Power Consumption Photonic Synapse Transistors Based on Organic Array Films Fabricated by Particular Prepatterned-Guided Crystallizing Strategy

Zihong Shen<sup>1</sup>, Zunxian Yang<sup>\*,1,2</sup>, Yuanqing Zhou<sup>1</sup>, Yuliang Ye<sup>1</sup>, Bingqing Ye<sup>1</sup>,  
Qiaocan Huang<sup>1</sup>, Wenbo Wu<sup>1</sup>, Hongyi Hong<sup>1</sup>, Zeqian hong<sup>1</sup>, Zongyi Meng<sup>1</sup>, Zhiwei  
Zeng<sup>1</sup>, Songwei Ye<sup>1</sup>, Zhiming Cheng<sup>1</sup>, Qianting Lan<sup>1</sup>, Jiaxiang Wang<sup>1</sup>, Ye Chen<sup>1</sup>, Hui  
Zhang<sup>1</sup>, Tailiang Guo<sup>1,2</sup>, Yun Ye<sup>1,2</sup>, Zhenzhen Weng<sup>3</sup>, Yongyi Chen<sup>3</sup>

<sup>1</sup>National & Local United Engineering Laboratory of Flat Panel Display Technology,  
Fuzhou University, Fuzhou 350108, P. R. China.

<sup>2</sup>Mindu Innovation Laboratory, Fujian Science & Technology Innovation Laboratory  
For Optoelectronic Information of China, Fuzhou, 350108, P.R. China

<sup>3</sup>Department of Physics, School of Physics and Information Engineering, Fuzhou  
University

## Supporting Information

### Captions

**Figure S1 (a)** The schematic diagram of the prepatterned-guided crystal-growth  
method. Schematic diagram of precursor solution drying method and crystal growth

---

\* Corresponding author should be addressed. Tel.: +86 591 8789 3299; Fax: +86 591 8789 2643  
E-mail: yangzunxian@hotmail.com (Z. Yang)

method on the substrate without **(b)** and with **(c)** prepattern.

**Figure S2** The morphology of TIPS-pentacene/PS film fabricated on the substrate without **(a)** and with **(b)** array pattern. The AFM image of intergranular crack between different crystals **(c)** and the grain boundary on the surface of the large grains **(d)**.

**Figure S3** The transfer curve of the transistors with the channel in the same crystal region **(a)**, with the grain boundary of two isotropic crystals **(b)**, and with the grain boundary of two extruded crystals **(c)**.

**Figure S4** The color map of the  $\mu_{FET}$  **(a)** and the current on/off ratio **(b)** of  $8 \times 8$  TIPS-pentacene transistor arrays with patterned-less film. The statistical heat map of the  $\mu_{FET}$  **(c)** and the current on/off ratio **(d)** of the transistors.

**Table S1** Performance comparison of TIPS-pentacene/PS transistors with prepattern and no pattern.

**Table S2** Comparison of electrical parameters of TIPS-pentacene organic thin film transistors fabricated by drop-coating or inkjet-printed.

**Figure S5** The source-drain current and the gate current of the transistor with perpendicular direction to the array films.

**Figure S6** The transfer curve of the array TIPS-pentacene/PS films-based transistor without **(a)** and with **(b)** CsPbBr<sub>3</sub> QDs.

**Figure S7** The AFM image of the surface of the pattern-less TIPS-pentacene/PS film **(a)**, the array TIPS-pentacene/PS film **(b)**, and the array TIPS-pentacene/PS/CPBQDs film **(c)**.

**Figure S8** The source-drain curves of ternary transistor under dark and with light illumination.

**Figure S9 (a)** The peak photocurrent after illumination being removed under different light power. **(b)** The peak photocurrent after illumination being removed under different light pulse duration.

**Figure S10** The EPSC of TIPS-pentacene/PS transistor.

**Figure S11** The EPSC with  $V_{DS}$  of -0.01 V, -0.001 V and -0.0001 V.

**Table S3** A summarized list of operation parameters and the power consumption of photonic synaptic per event with perovskite and organic materials.

**Figure S12 (a)** The peak photocurrent after illumination being removed under different light pulse duration. **(b)** The decay photocurrent of synapse and the fitting curve of the stretched-exponential function.

**Table S4** Comparison of the retention characteristics with previously reported photonic synaptic devices.

**Table S5** Comparison of the retention characteristics of ternary composite synapses with different incident light pulse width, number, and frequency.

**Figure S13** The schematic diagram of the operating mechanism of ternary synaptic device under light illumination **(a)** and negative gate voltage **(b)**.

**Figure S14 (a)** The EPSC of the TIPS-pentacene/PS transistor with and without CsPbBr<sub>3</sub> QDs in  $V_{DS}$  of -1 V. **(b)** The EPSC of the TIPS-pentacene/ CsPbBr<sub>3</sub> QDs transistor in  $V_{DS}$  of -10 V.

**Figure S15 (a)** The morphology of TIPS-pentacene/ CsPbBr<sub>3</sub> QDs film without array

pattern. **(b)** The transfer curve of the TIPS-pentacene/ CsPbBr<sub>3</sub> QDs films transistor. **(c)** The morphology of TIPS-pentacene/ CsPbBr<sub>3</sub> QDs film without array pattern under blue light. **(d)** The morphology of TIPS-pentacene/PS/CPBQDs film with array pattern under blue light.

**Figure S16 (a)** Multitude cycles of 10 consecutive light pulses. **(b)** Multitude cycles of 10 consecutive electric pulses. **(c)** Multitude cycles of light potentiation and electric depression of ternary synapse.

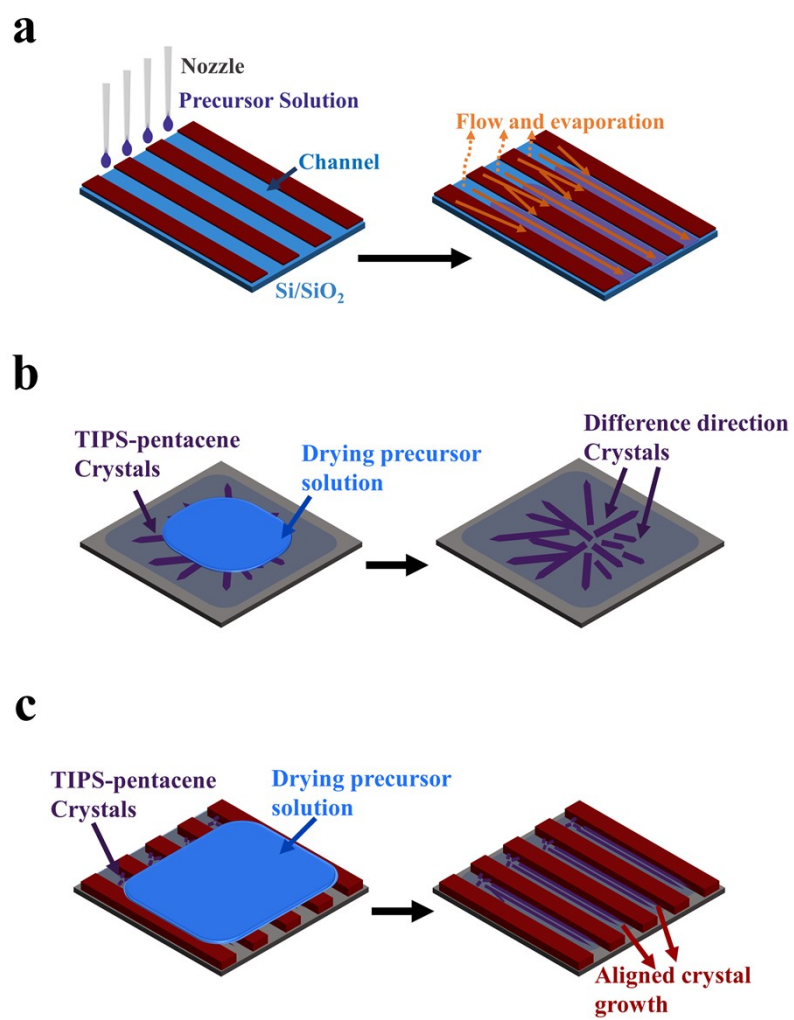

Figure S1

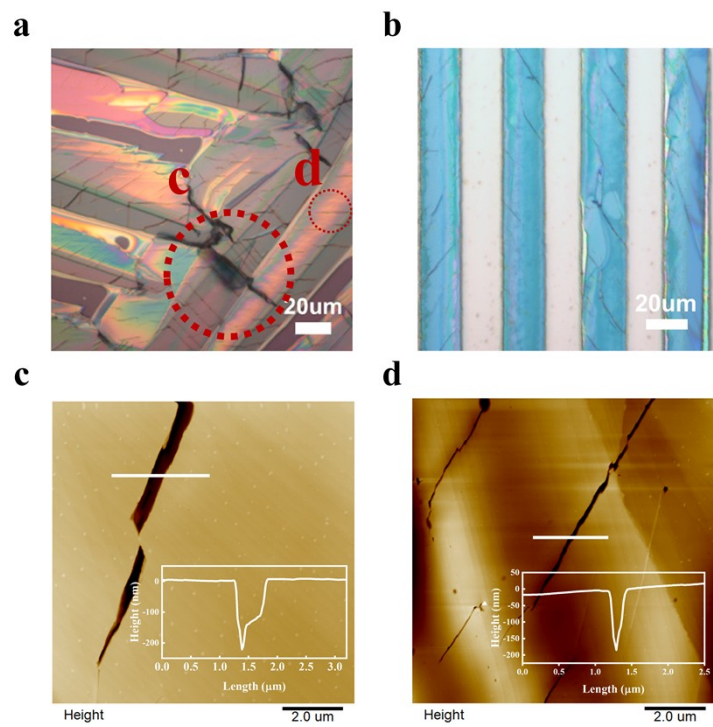

**Figure S2**

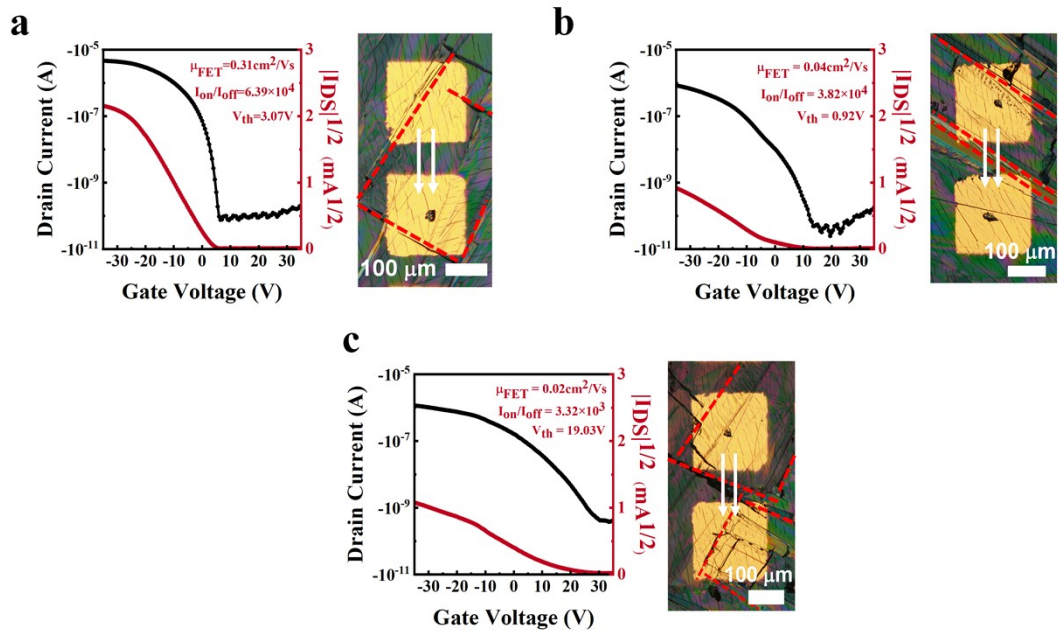

**Figure S3**

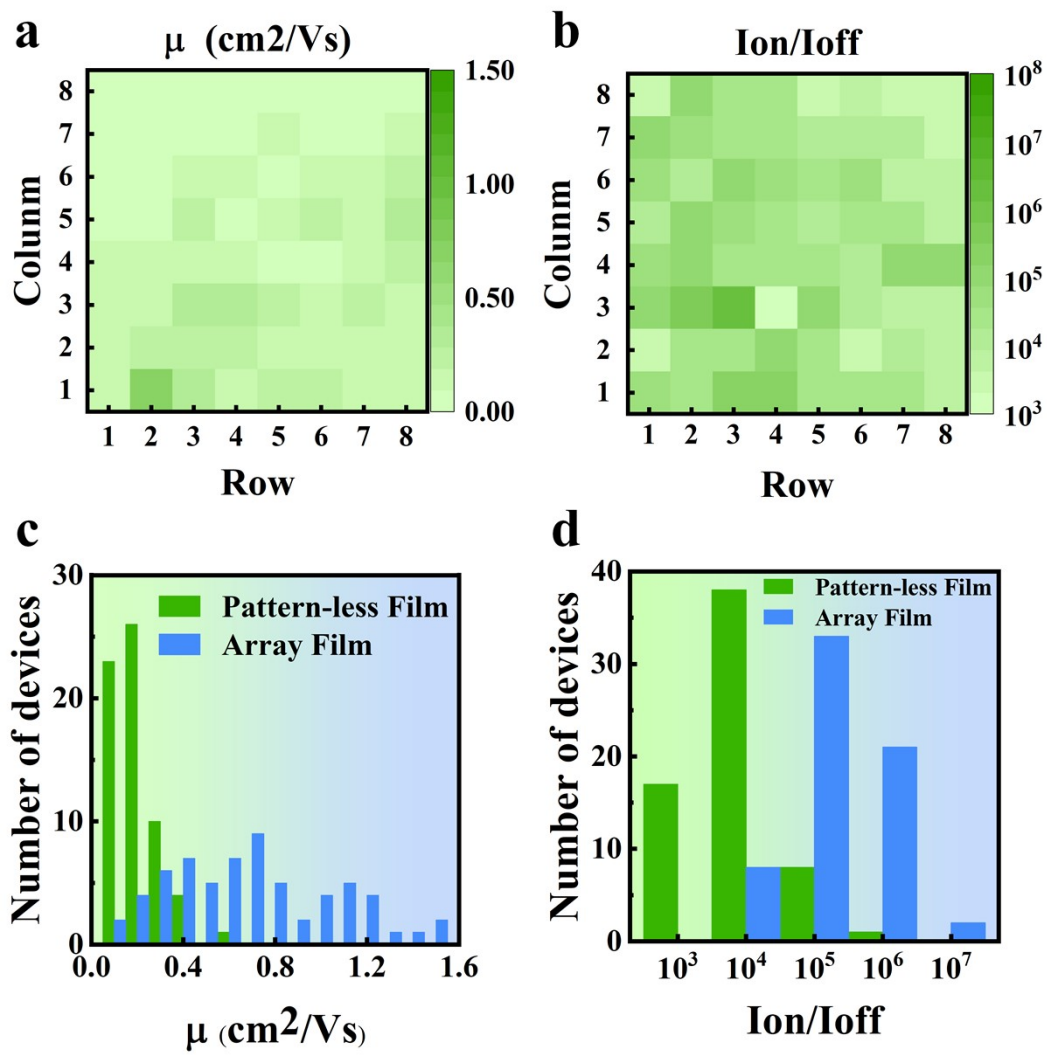

Figure S4



**Table S1**

| Preparation Method | $\mu$ (cm <sup>2</sup> /Vs) |       | $I_{\text{on}}/I_{\text{off}}$ |
|--------------------|-----------------------------|-------|--------------------------------|
|                    | Average                     | Max.  |                                |
| Pattern-less       | $0.150 \pm 0.014$           | 0.658 | $>10^6$                        |
| Prepattern         | $0.637 \pm 0.354$           | 1.473 | $>10^7$                        |

**Table S2**

| <b>Precursor</b>                                 | <b>Solvent</b> | <b>Dielectric</b>      | <b>Electrode<br/>W/L (um)</b> | <b><math>\mu</math><br/>(cm<sup>2</sup>/Vs)</b> | <b>I<sub>on</sub>/I<sub>off</sub></b> | <b>Ref.</b>          |
|--------------------------------------------------|----------------|------------------------|-------------------------------|-------------------------------------------------|---------------------------------------|----------------------|
| TIPS-pentacene: PS                               | Toluene        | HfO <sub>2</sub>       | 700/94                        | 0.44                                            | ~10 <sup>5</sup>                      | [1]                  |
| SiO <sub>2</sub> nanoparticle/<br>TIPS-pentacene | Toluene        | SiO <sub>2</sub>       | 2000/50                       | 0.1                                             | ~10 <sup>5</sup>                      | [2]                  |
| TIPGe-pentacene                                  | Toluene        | AlO <sub>x</sub>       | 3000/45                       | 0.4                                             | ~10 <sup>5</sup>                      | [3]                  |
| TIPS-pentacene                                   | Tetralin       | PS Brushes             | 100/30                        | 1.2                                             | 1.2×10 <sup>7</sup>                   | [4]                  |
| TIPS-pentacene                                   | Hexane         | PVDF-TrFE              | --                            | 1                                               | >10 <sup>5</sup>                      | [5]                  |
| TIPS-pentacene                                   | Hexane         | PMMA                   | 1000/50                       | ~1                                              | >10 <sup>6</sup>                      | [6]                  |
| TIPS-pentacene: PS                               | Chlorobenzene  | PVC                    | --                            | 0.6                                             | ~10 <sup>6</sup>                      | [7]                  |
| TIPS-pentacene                                   | Chlorobenzene  | PVA                    | --                            | 0.79                                            | ~10 <sup>4</sup>                      | [8]                  |
| TIPS-pentacene: PS                               | Anisole        | SiO <sub>2</sub>       | 1000/80                       | 1.3                                             | >10 <sup>5</sup>                      | [9]                  |
| <b>TIPS-pentacene:<br/>PS</b>                    | <b>Toluene</b> | <b>SiO<sub>2</sub></b> | <b>1000/100</b>               | <b>1.47</b>                                     | <b>5.8×10<sup>7</sup></b>             | <b>This<br/>work</b> |

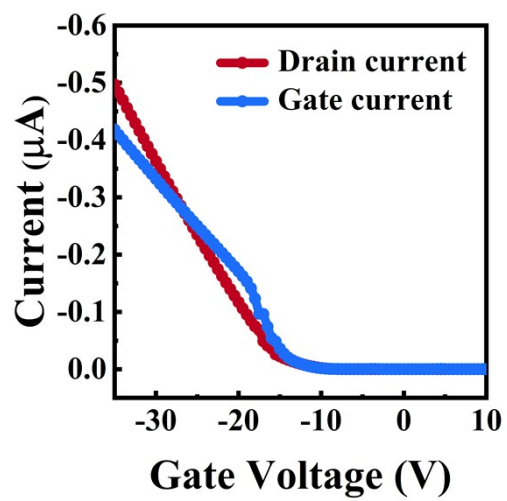

Figure S5

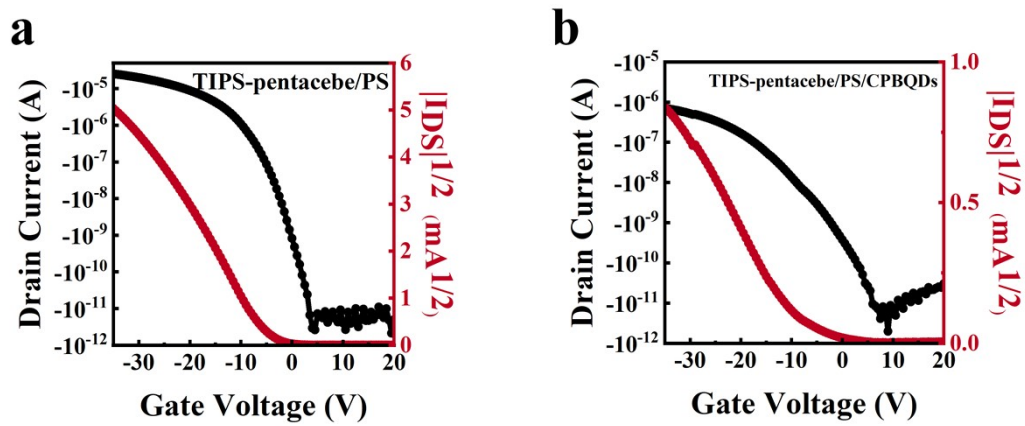

Figure S6

**a**

**Pattern-less TIPS/PS Film**

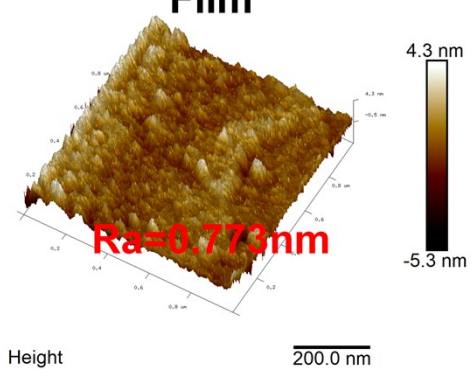

**b**

**Array TIPS/PS Film**

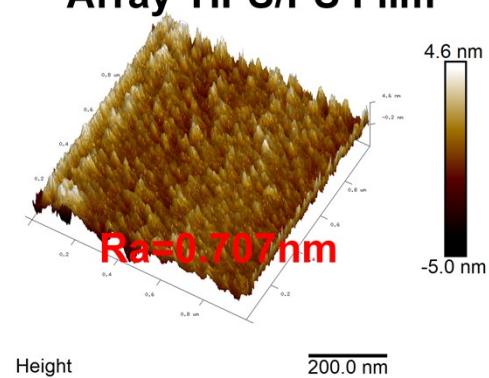

**c**

**Array TIPS/PS/CPBQDs Film**

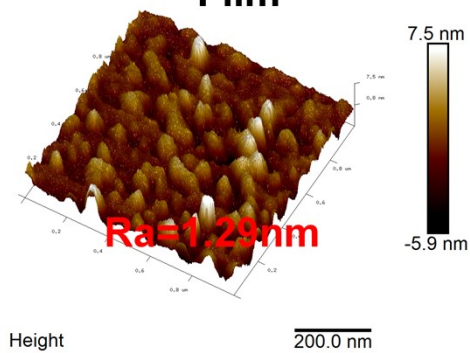

**Figure S7**

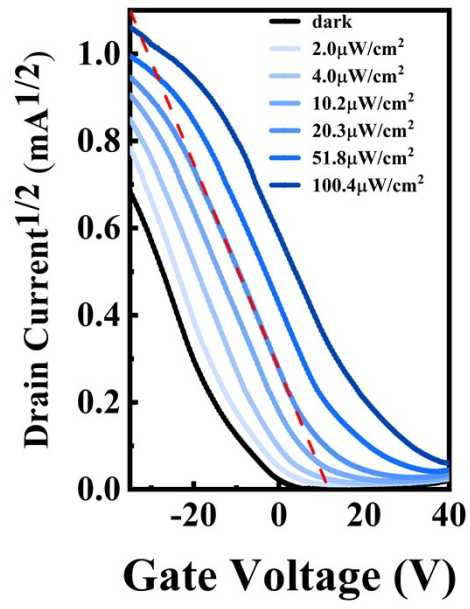

Figure S8

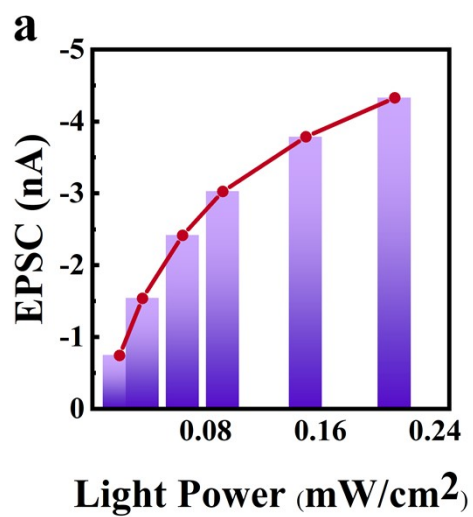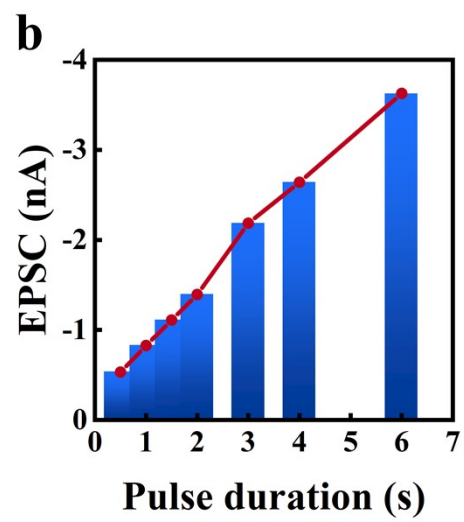

Figure S9

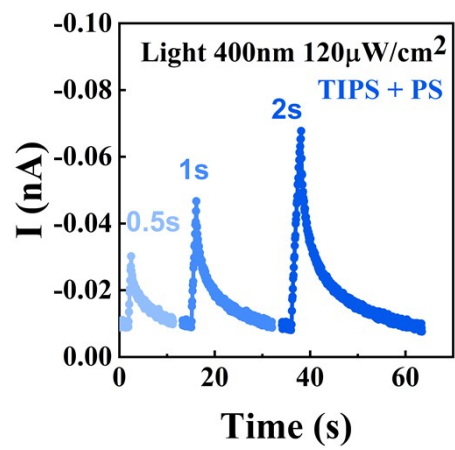

Figure S10



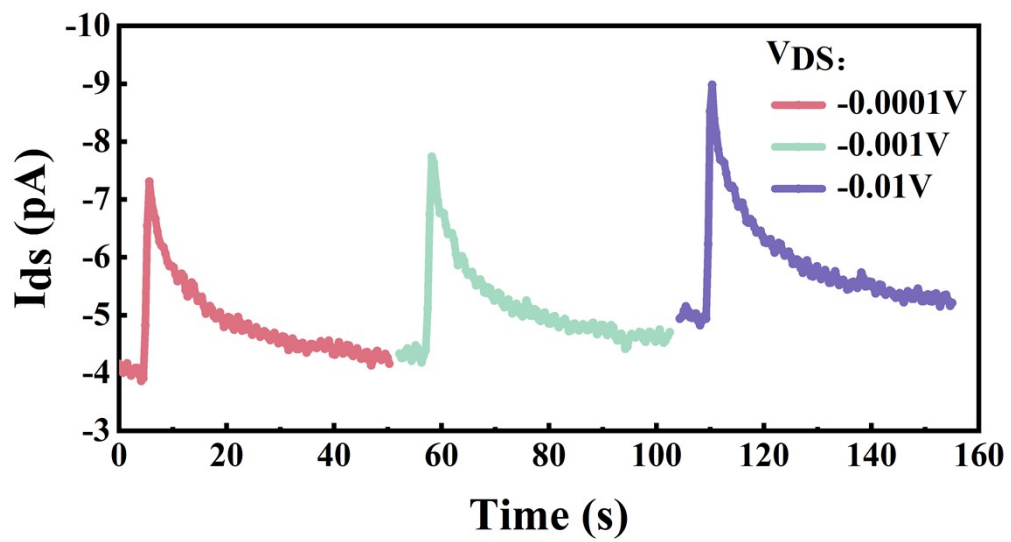

Figure S11

**Table S3**

| <b>Material</b>                                      | <b>Reading voltage [V]</b>            | <b>Light Duration [ms]</b> | <b>Light Intensity [<math>\mu\text{W cm}^{-2}</math>]</b> | <b>Power Consumption [fJ]</b> | <b>Ref.</b>      |
|------------------------------------------------------|---------------------------------------|----------------------------|-----------------------------------------------------------|-------------------------------|------------------|
| DPPDTT/CsPbBr <sub>3</sub> QDs                       | $-5 \times 10^{-4}$                   | 50                         | 50                                                        | 0.5                           | [10]             |
| CsPbBr <sub>3</sub> QDs/P <sub>3</sub> HT            | -0.001                                | -                          | -                                                         | 0.18                          | [11]             |
| P <sub>3</sub> HT/FAPbBr <sub>3</sub> QDs            | $-5 \times 10^{-4}$                   | 50                         | 6000                                                      | 0.03                          | [12]             |
| MAPbBr <sub>3</sub> /PS/Pentacene                    | -1                                    | 50                         | 420                                                       | 5800                          | [13]             |
| CsPbBr <sub>3</sub> film/ TIPS-Pentacene             | -0.01                                 | ~200                       | 46                                                        | 76                            | [14]             |
| C <sub>8</sub> -BTBT/PS/ CsPbBr <sub>3</sub> QDs     | -0.01                                 | 10                         | 0.5                                                       | 0.11                          | [15]             |
| MAPbBr <sub>3</sub> -RhB /Pentacene                  | $-5 \times 10^{-5}$                   | 1000                       | 58                                                        | 1.25                          | [16]             |
| <b>TIPS-Pentacene/PS/<br/>CsPbBr<sub>3</sub> QDs</b> | <b><math>-1 \times 10^{-4}</math></b> | <b>50</b>                  | <b>25</b>                                                 | <b>0.036</b>                  | <b>This work</b> |

**a**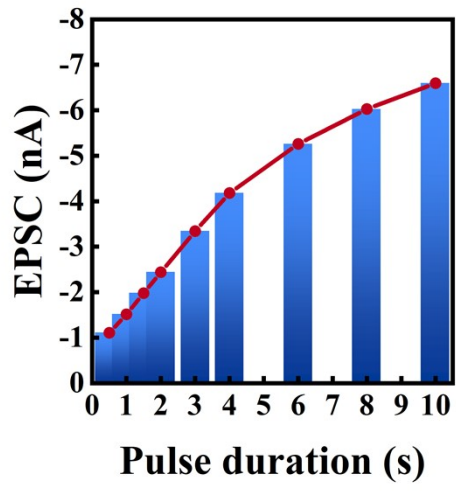**b**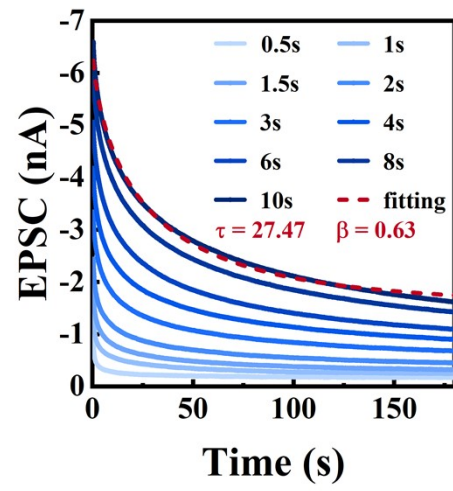**Figure S12**

**Table S4**

| Material                                             | $\tau$ (s)   | $\beta$     | Light stimulation condition |                                |                             |                 | Ref.                 |
|------------------------------------------------------|--------------|-------------|-----------------------------|--------------------------------|-----------------------------|-----------------|----------------------|
|                                                      |              |             | Wavelength<br>h (nm)        | Power<br>(mW/cm <sup>2</sup> ) | Frequency<br>or<br>duration | Pulse<br>number |                      |
| amorphous Si                                         | 18.29        | 0.49        | 450                         | 110                            | > 15s                       | 1               | [17]                 |
| C8-BTBT/PAN                                          | 0.685        |             | 360                         | 0.9                            | 0.2s                        | 1               | [18]                 |
| HfS <sub>2</sub>                                     | 0.128        | 0.354       | 405                         | 43.3                           | 0.5s                        | 1               | [19]                 |
| M-QD/ $\alpha$ -IGZO                                 | 27.1         | 0.51        | 405                         |                                |                             |                 |                      |
|                                                      | 65.2         | 0.67        | 519                         | 5                              | 2.5Hz                       | 30              | [20]                 |
|                                                      | 18.2         | 0.4         | 635                         |                                |                             |                 |                      |
| <b>TIPS-Pentacene/PS/<br/>CsPbBr<sub>3</sub> QDs</b> | <b>27.47</b> | <b>0.63</b> | <b>450</b>                  | <b>0.2</b>                     | <b>10s</b>                  | <b>1</b>        | <b>This<br/>work</b> |

**Table S5**

| <b>Duration</b><br>[s] | $\tau$ (s) | $\beta$ | <b>Number</b><br>[#] | $\tau$ (s) | $\beta$ | <b>Frequency</b><br>[Hz] | $\tau$ (s) | $\beta$ |
|------------------------|------------|---------|----------------------|------------|---------|--------------------------|------------|---------|
| <b>0.5</b>             | 1.33       | 0.35    | <b>1</b>             | 16.43      | 0.90    | <b>0.1</b>               | 9.87       | 0.45    |
| <b>1</b>               | 5.04       | 0.43    | <b>2</b>             | 20.29      | 0.83    | <b>0.2</b>               | 11.33      | 0.46    |
| <b>1.5</b>             | 7.09       | 0.45    | <b>4</b>             | 31.30      | 0.95    | <b>1</b>                 | 11.71      | 0.46    |
| <b>2</b>               | 10.47      | 0.48    | <b>6</b>             | 36.98      | 0.99    | <b>2</b>                 | 13.31      | 0.48    |
| <b>3</b>               | 14.17      | 0.52    | <b>8</b>             | 40.98      | 1.04    | <b>5</b>                 | 17.11      | 0.52    |
| <b>4</b>               | 17.53      | 0.55    | <b>10</b>            | 43.65      | 1.05    |                          |            |         |
| <b>6</b>               | 20.66      | 0.59    |                      |            |         |                          |            |         |
| <b>8</b>               | 25.01      | 0.62    |                      |            |         |                          |            |         |
| <b>10</b>              | 27.47      | 0.63    |                      |            |         |                          |            |         |

**a**

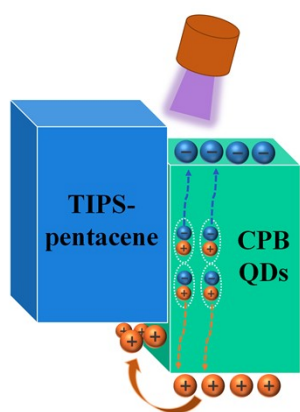

**Photo-programming**

**b**

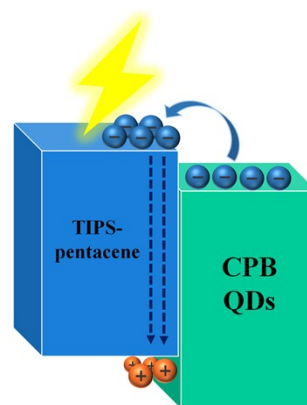

**Electrical-erasing**

**Figure S13**

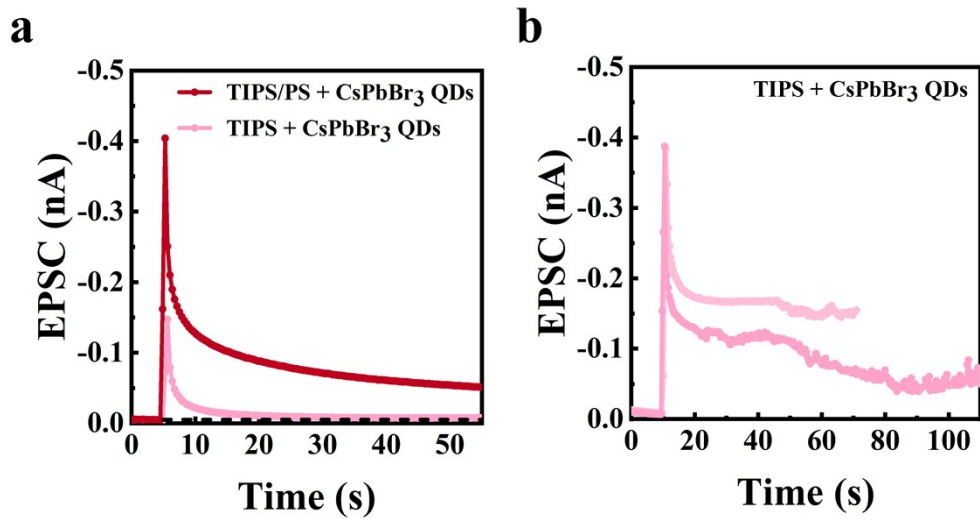

Figure S14

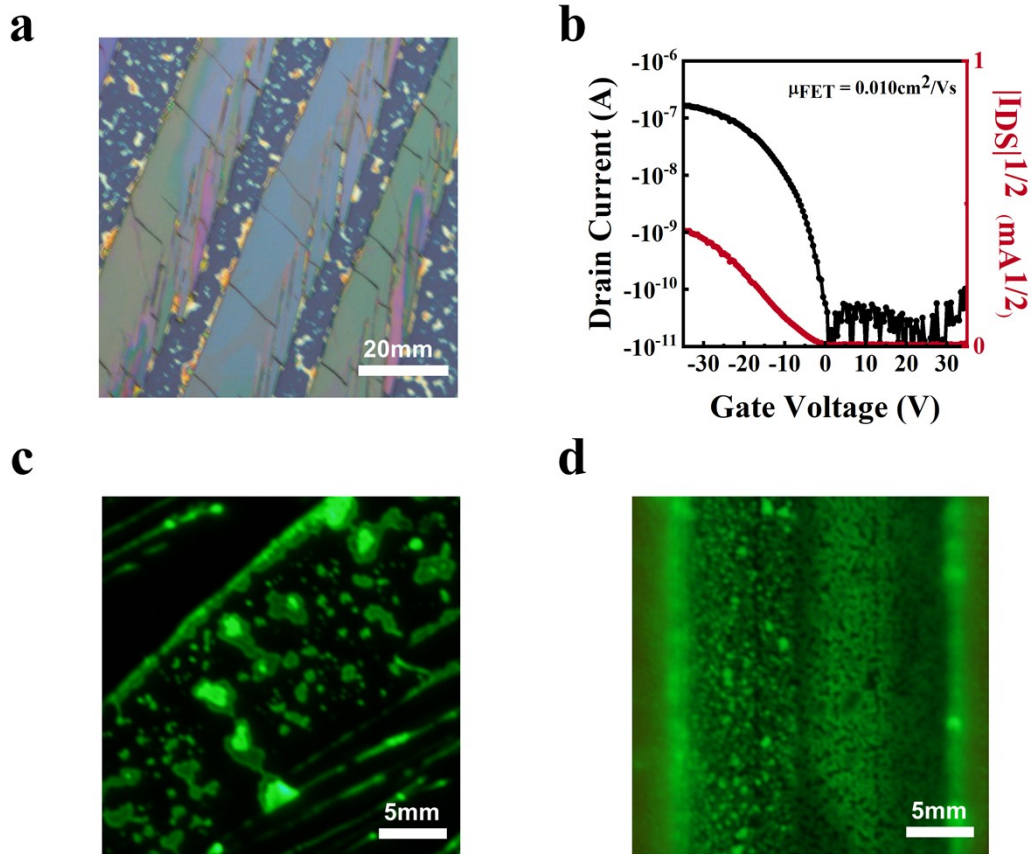

Figure S15



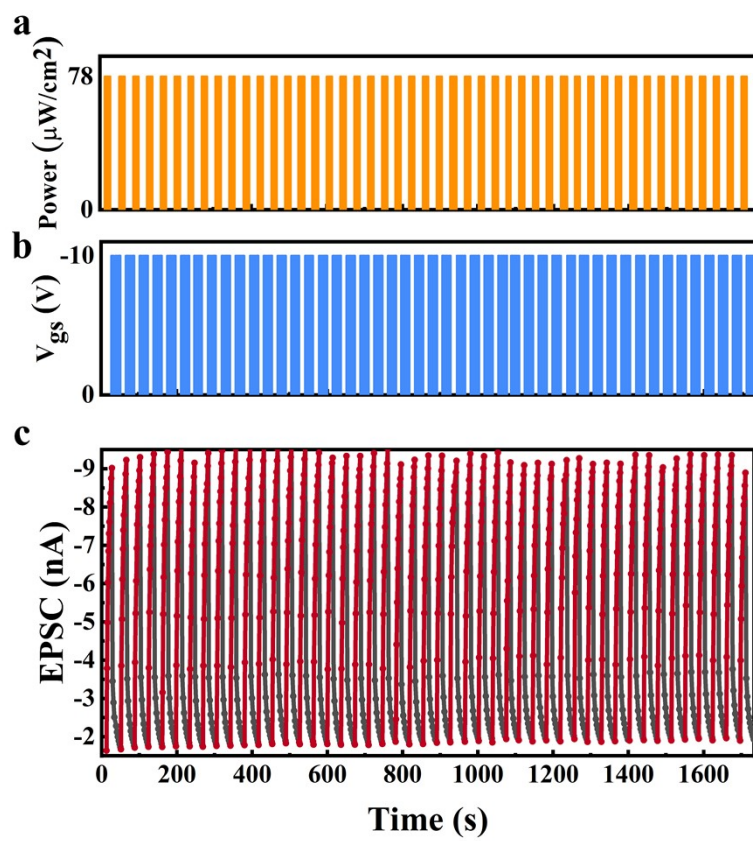

Figure S16

## References

- [1] Vivek Raghuwanshi, Deepak Bharti, Ajay Kumar Mahato, Ishan Varun, Shree Prakash Tiwari, Solution-Processed Organic Field-Effect Transistors with High Performance and Stability on Paper Substrates. **ACS applied materials & interfaces**, **2019**, **11**(8): 8357-8364.
- [2] Zhengran He, Kai Xiao, William Durant, Dale K. Hensley, John E. Anthony, Kunlun Hong, S. Michael Kilbey, II, Jihua Chen, Dawen Li, Enhanced Performance Consistency in Nanoparticle/TIPS Pentacene-Based Organic Thin Film Transistors. **Advanced Functional Materials**, **2011**, **21**(19): 3617-3623.
- [3] Andrea Ciavatti, Laura Basirico, Ilaria Fratelli, Stefano Lai, Piero Cosseddu, Annalisa Bonfiglio, John E. Anthony, Beatrice Fraboni, Boosting Direct X-Ray Detection in Organic Thin Films by Small Molecules Tailoring. **Advanced Functional Materials**, **2019**, **29**(21): 1806119.
- [4] Feng Ge, Xiaohong Wang, Yunfeng Zhang, Eunjoo Song, Guobing Zhang, Hongbo Lu, Kilwon Cho, Longzhen Qiu, Modulating the Surface via Polymer Brush for High-Performance Inkjet-Printed Organic Thin-Film Transistors. **Advanced Electronic Materials**, **2017**, **3**(1): 1600402.
- [5] Amrit Laudari, Alec Pickett, Fatemeh Shahedipour-Sandvik, Kasey Hogan, John E. Anthony, Xiaoqing He, Suchismita Guha, Textured Poling of the Ferroelectric Dielectric Layer for Improved Organic Field-Effect Transistors. **Advanced Materials Interfaces**, **2019**, **6**(4): 1801787.

[6] Huihong Jiang, Boyu Peng, Shuang Liu, Jie Ren, Weitao Yang, Chengce Lin, Ruihan Wu, Hongzheng Chen, Hanying Li, Bending TIPS-pentacene single crystals: from morphology to transistor performance. **Journal of Materials Chemistry C**, **2021**, **9**(17): 5621-5627.

[7] Linrun Feng, Wei Tang, Jiaqing Zhao, Ruozhang Yang, Wei Hu, Qiaofeng Li, Ruolin Wang, Xiaojun Guo, Unencapsulated Air-stable Organic Field Effect Transistor by All Solution Processes for Low Power Vapor Sensing. **Scientific Reports**, **2016**, **6**: 20671.

[8] Xiaoli Zhao, Bing Zhang, Qingxin Tang, Xueyan Ding, Shuya Wang, Yuying Zhou, Yanhong Tong, Yichun Liu, Conformal transistor arrays based on solution-processed organic crystals. **Scientific Reports**, **2017**, **7**: 15367.

[9] T. Kaimakamis, C. Pitsalidis, A. Papamichail, A. Laskarakis, S. Logothetidis, Organic transistors based on airbrushed small molecule-insulating polymer blends with mobilities exceeding  $1 \text{ cm}^2 \text{ V}^{-1} \text{ s}^{-1}$ . **RSC Advances**, **2016**, **6**(99): 97077-97083.

[10] Dandan Hao, Junyao Zhang, Shilei Dai, Jianhua Zhang, Jia Huang, Perovskite/Organic Semiconductor-Based Photonic Synaptic Transistor for Artificial Visual System. **ACS applied materials & interfaces**, **2020**, **12**(35): 39487-39495.

[11] Ender Ercan, Yancheng Lin, Weichen Yang, Wenchang Chen, Self-Assembled Nanostructures of Quantum Dot/Conjugated Polymer Hybrids for Photonic Synaptic Transistors with Ultralow Energy Consumption and Zero-Gate Bias. **Advanced Functional Materials**, **2021**, **32**(6): 2107925.

- [12] Jungyao Chen, Donglin Yang, Fucheng Jhuang, Yuhan Fang, Jeansebastien Benas, Fangcheng Liang, Chiching Kuo, Ultrafast Responsive and Low-Energy-Consumption Poly(3-hexylthiophene)/Perovskite Quantum Dots Composite Film-Based Photonic Synapse. **Advanced Functional Materials**, 2021, 31(47): 2105911.
- [13] Kyuho Lee, Hyowon Han, Youngwoo Kim, Jumi Park, Seonghoon Jang, Hyeokjung Lee, Seung Won Lee, HoYeon Kim, Yeeun Kim, Taebin Kim, Dongho Kim, Gunuk Wang, Cheolmin Park, Retina-Inspired Structurally Tunable Synaptic Perovskite Nanocones. **Advanced Functional Materials**, 2021, 31(52): 2105596.
- [14] Jiahui Liu, Zunxian Yang, Zhipeng Gong, Zihong Shen, Yuliang Ye, Baoyong Yang, Yinglin Qiu, Bingqing Ye, Lei Xu, Tailiang Guo, Sheng Xu, Weak Light-Stimulated Synaptic Hybrid Phototransistors Based on Islandlike Perovskite Films Prepared by Spin Coating. **ACS applied materials & interfaces**, 2021, 13(11): 13362-13371.
- [15] Qianqian Shi, Dapeng Liu, Dandan Hao, Junyao Zhang, Li Tian, Lize Xiong, Jia Huang, Printable, ultralow-power ternary synaptic transistors for multifunctional information processing system. **Nano Energy**, 2021, 87: 106197.
- [16] Junyao Zhang, Shilei Dai, Yiwei Zhao, Jianhua Zhang, Jia Huang, Recent Progress in Photonic Synapses for Neuromorphic Systems. **Advanced Intelligent Systems**, 2020, 2(3): 1900136.
- [17] Xin Wang, Dandan Hao, Jia Huang, Dye-sensitized perovskite/organic semiconductor ternary transistors for artificial synapses. **Science China Materials**,

2022, 65: 2521–2528.

[18] Shilei Dai, Xiaohan Wu, Dapeng Liu, Yingli Chu, Kai Wang, Ben Yang, Jia Huang, Light-Stimulated Synaptic Devices Utilizing Interfacial Effect of Organic Field-Effect Transistors. **Acs Applied Materials & Interfaces**, 2018, 10(25): 21472-21480.

[19] Hao Xiong, Liping Xu, Caifang Gao, Qing Zhang, Menghan Deng, Qiangfei Wang, Jinzhong Zhang, Dirk Fuchs, Wenwu Li, Anyang Cui, Liyan Shang, Kai Jiang, Zhigao Hu, Junhao Chu, Optically Modulated HfS<sub>2</sub>-Based Synapses for Artificial Vision Systems. **ACS applied materials & interfaces**, 2021, 13(42): 50132-50140.

[20] Chanh Jo, Jaehyun Kim, Jee Young Kwak, Sung Min Kwon, Joon Bee Park, Jeehoon Kim, Gyeong-Su Park, Myung-Gil Kim, Yong-Hoon Kim, Sung Kyu Park, Retina-Inspired Color-Cognitive Learning via Chromatically Controllable Mixed Quantum Dot Synaptic Transistor Arrays. **Advanced Materials**, 2022, 34(12): 2108979.
